# Supplementary material
Source: Royal Society of Chemistry journal article supplement (doi:10.1039/d6nj00088f)
Supplement: d6nj00088f1.pdf [file d6nj00088f1.pdf]

## Electronic Supporting Information (ESI)

### **Novel nitrogen self-doped hydrochar from Siam weed (*Chromolaena odorata* L.) leaves for a highly efficient crystal violet removal from water**

**Ria Ervilita,<sup>1,a</sup> Muhammad Zulfajri,<sup>1,a,\*</sup> Muhammad Adlim,<sup>b,c</sup> Sri Sudewi,<sup>d</sup> Sri Ismulyati,<sup>a</sup>  
and Genin Gary Huang<sup>e,\*</sup>**

*<sup>a</sup>Department of Chemistry Education, Universitas Serambi Mekkah, Banda Aceh, Aceh 23245, Indonesia*

*<sup>b</sup>Chemistry Department, FKIP, Universitas Syiah Kuala, Banda Aceh, Aceh 23111, Indonesia*

*<sup>c</sup>Graduate School of Mathematics and Applied Science, Universitas Syiah Kuala, Banda Aceh, Aceh 23111, Indonesia*

*<sup>d</sup>Department of Pharmacy, Faculty of Mathematics and Natural Science, Universitas Sam Ratulangi, Manado 95115, Indonesia*

*<sup>e</sup>Department of Medicinal and Applied Chemistry, Kaohsiung Medical University, Kaohsiung 80708, Taiwan.*

I Contributed equally

\* Corresponding author: m.zulfajri@gmail.com (Muhammad Zulfajri) /

genin@kmu.edu.tw (Genin Gary Huang)

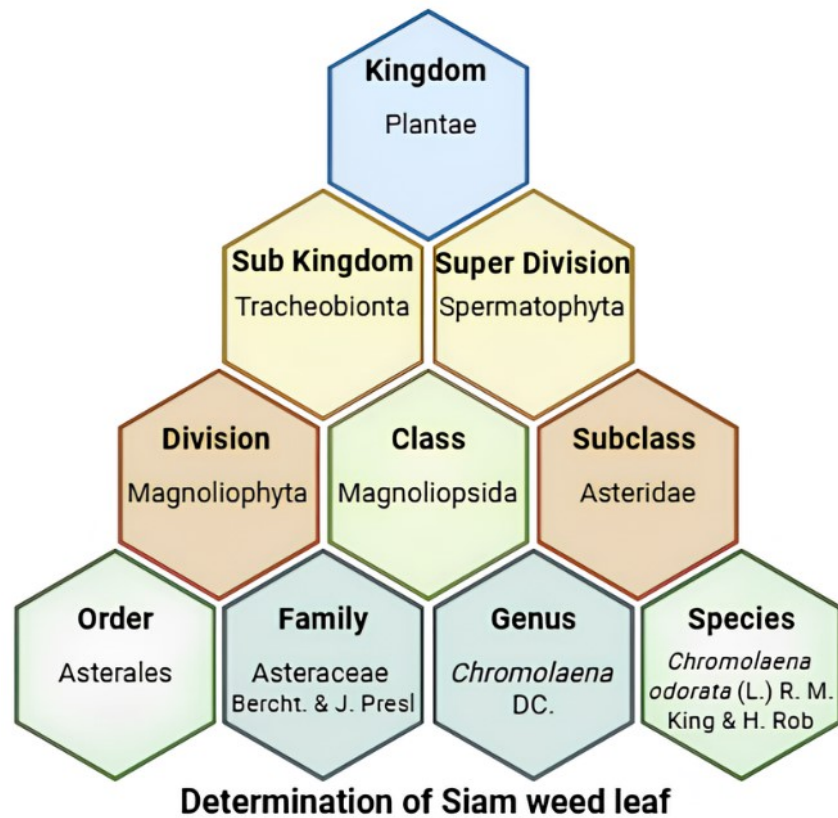

**Fig. S1** The plant determination with classification and taxonomy of SW leaves.

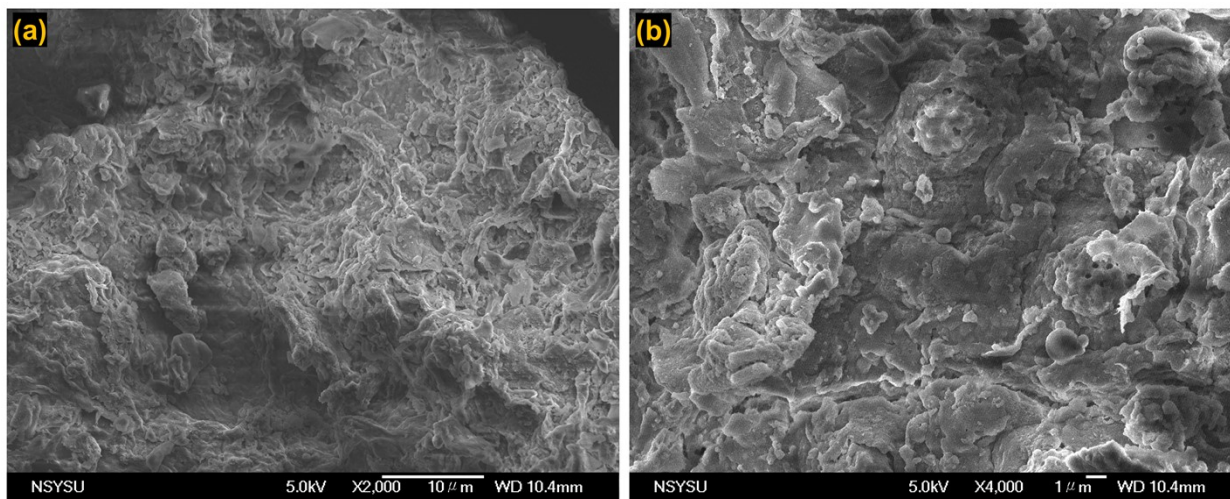

**Fig. S2** The SEM images of pristine HC with (a) 2000× and (b) 4000x magnifications

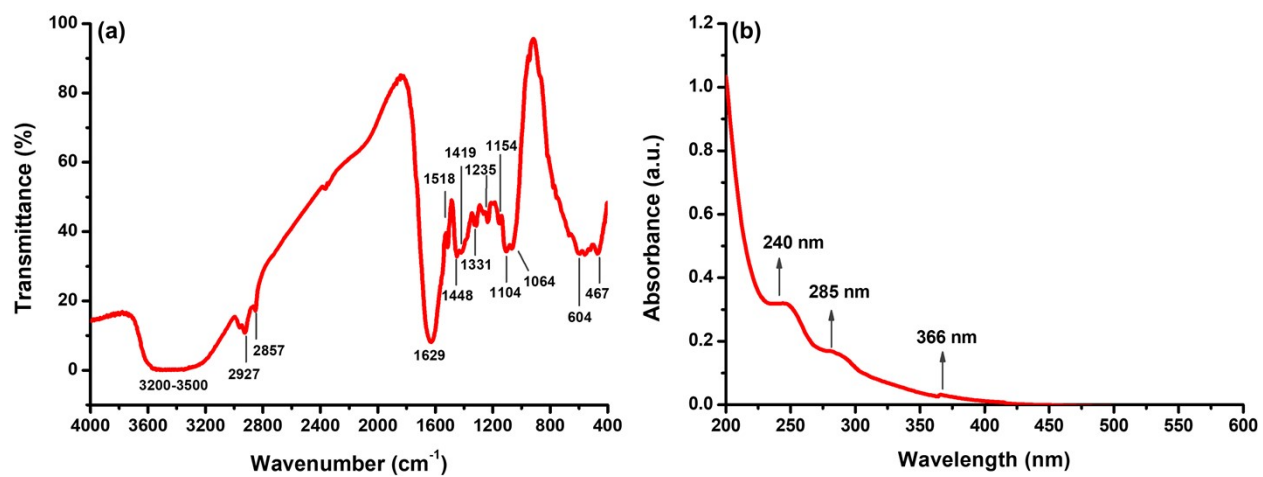

**Fig. S3** The (a) FTIR spectrum and (b) UV-vis spectrum of NSD-HC.

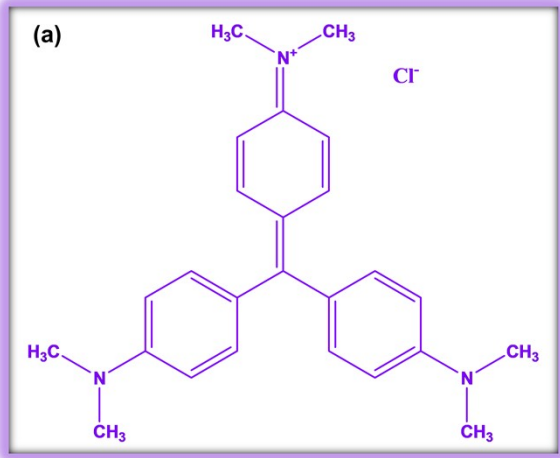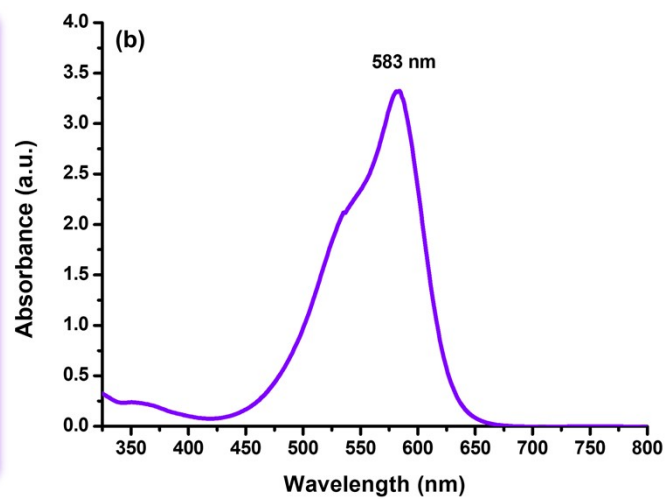

**Fig. S4** (a) The molecular structure of CV and (b) the UV-vis spectrum of CV in water.

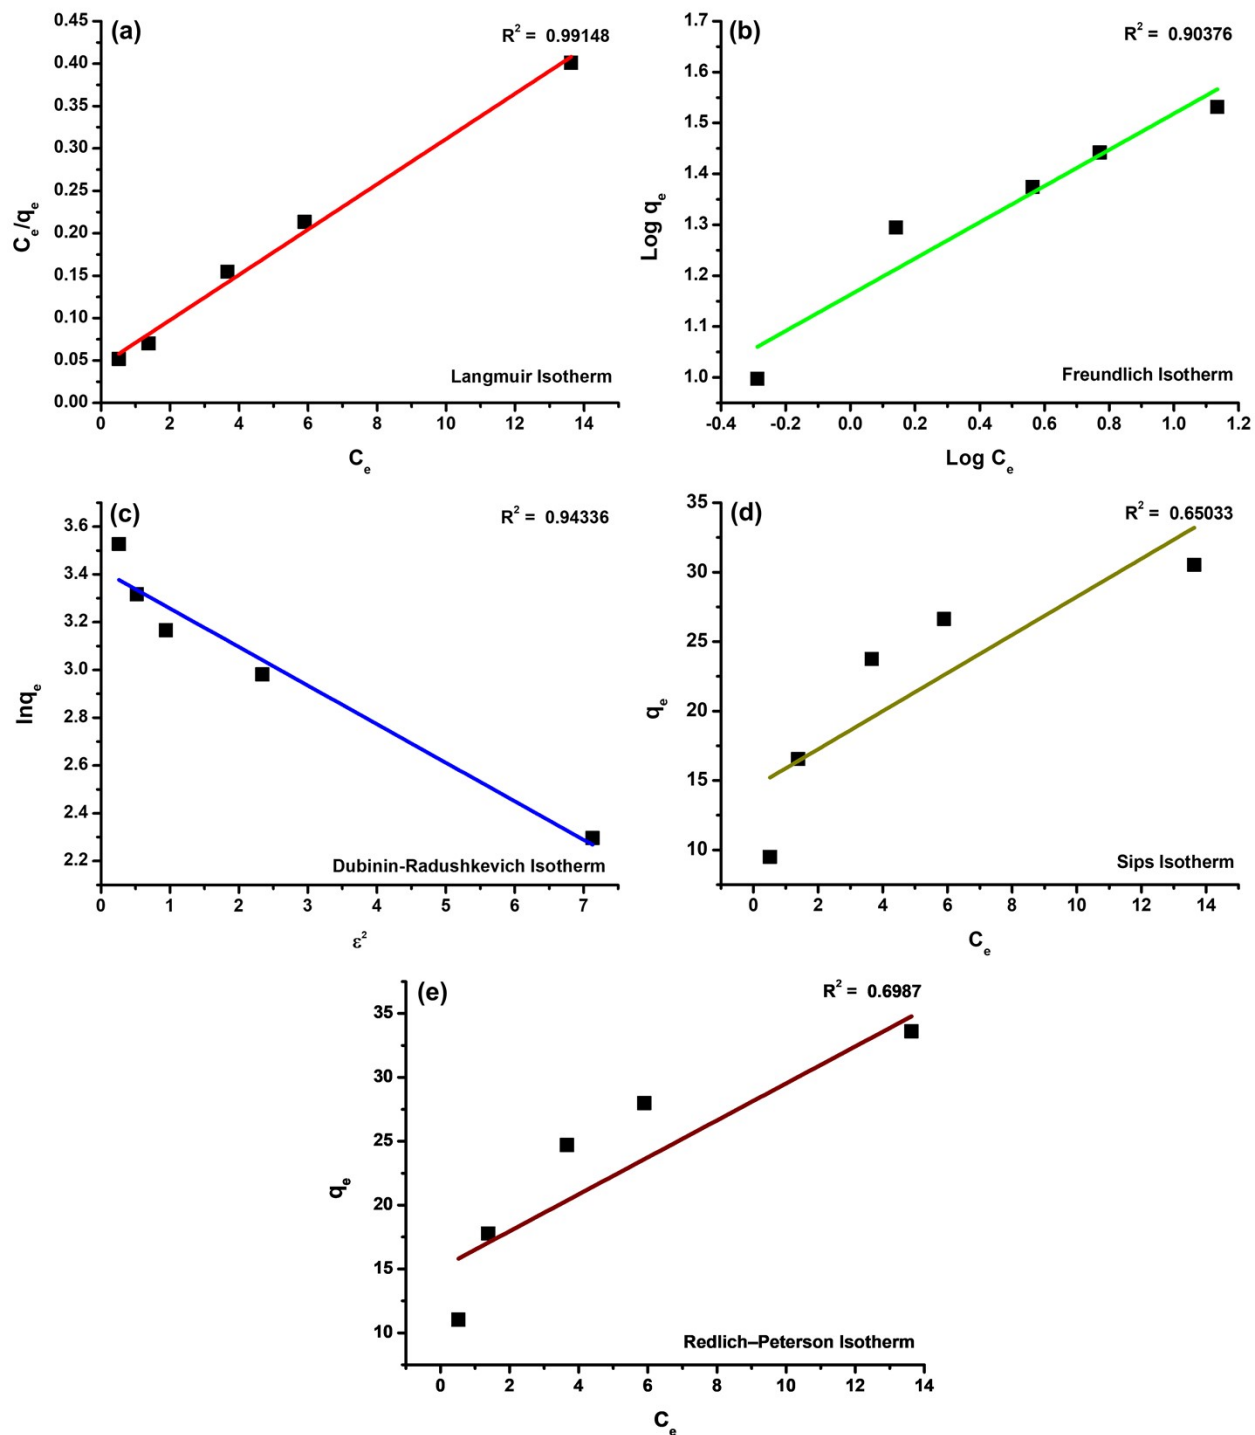

**Fig. S5** The plots of (a) the Langmuir, (b) Freundlich, (c) Dubinin-Radushkevich, (d) Sips, and (e) Redlich-Peterson isotherm models for the adsorption of CV.

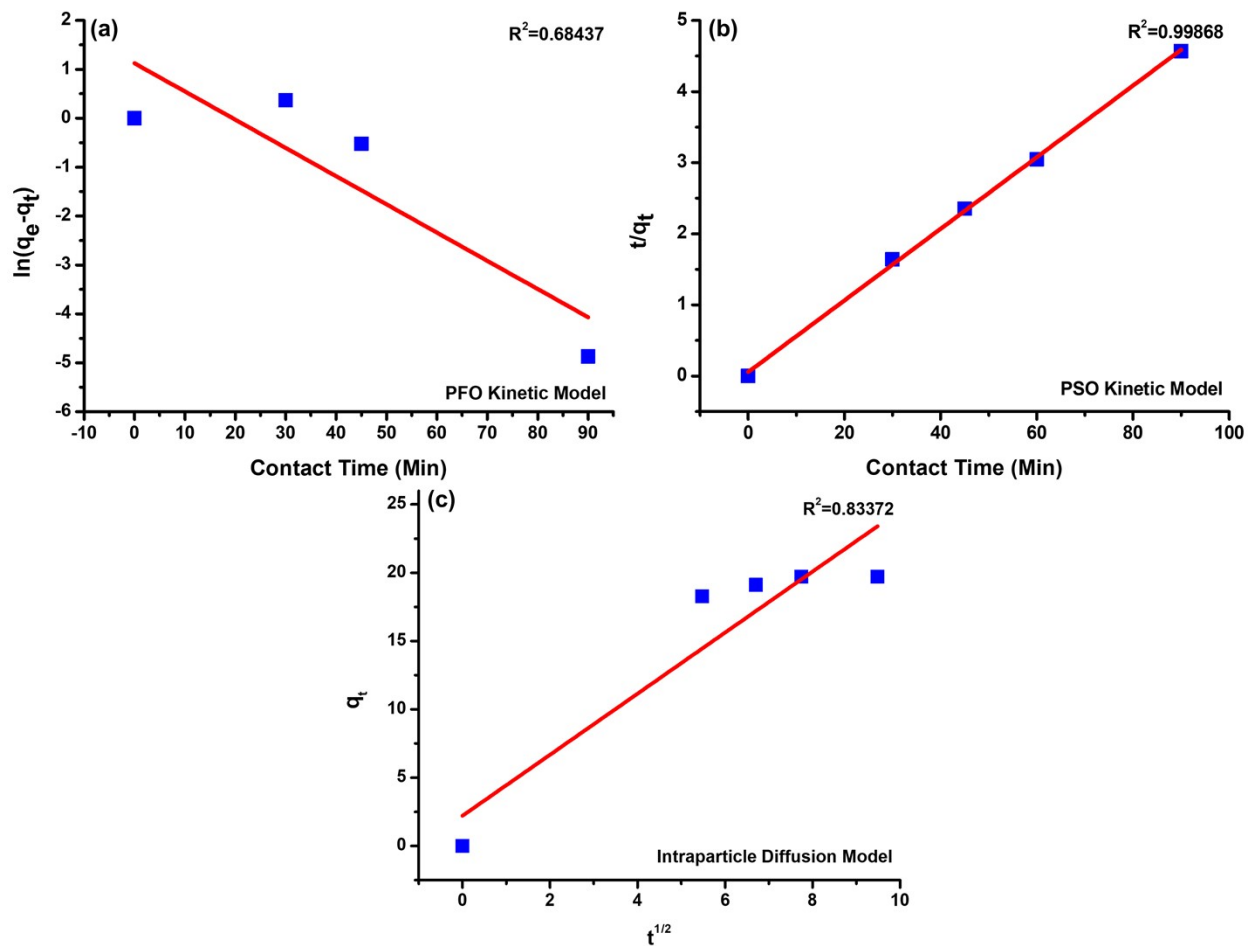

**Fig. S6** The plots of (a) Pseudo-first-order kinetic, (b) Pseudo-second-order kinetic, and (c) intraparticle diffusion models for the CV adsorption.

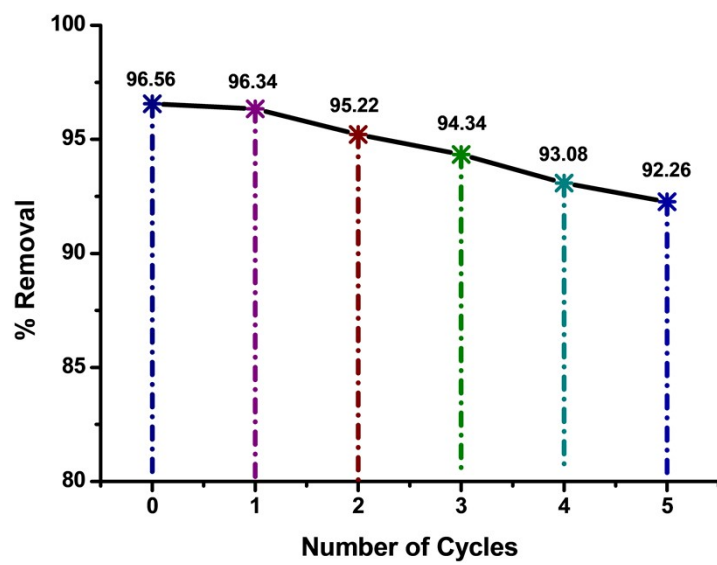

**Fig. S7** Removal efficiency (%) of 100  $\mu\text{M}$  CV onto 10 mg NSD-HC over five consecutive cycles using 70% ethanol as desorbing agent.
